# Supplementary material
Source: publisher site journal article supplement (https://www.dovepress.com/article/180913)
Supplement: Supplementary file 1 [file get_supplementary_file.php%3Ff%3D180913.pdf]

## **SUPPLEMENTARY MATERIALS**

**Title:** Impact of Antiepileptic Drug Treatment Burden on Healthcare Resource Utilization and Costs

**Authors:** Krithika Rajagopalan PhD, Sean D. Candrilli PhD Mayank Ajmera PhD

Supplementary materials

**Table S1. All-Cause and Epilepsy-Related<sup>a</sup> Unadjusted Healthcare Resource Utilization and Costs per Patient During the 12-Month Follow-up Period, by Index AED Pill Burden**

| <b>All-Cause Healthcare Resource Utilization and Costs</b> |                       |                             |                              |                              |                            |
|------------------------------------------------------------|-----------------------|-----------------------------|------------------------------|------------------------------|----------------------------|
|                                                            | <b>All Patients</b>   | <b>&gt;0-1 Pill per Day</b> | <b>&gt;1-2 Pills per Day</b> | <b>&gt;2-3 Pills per Day</b> | <b>&gt;3 Pills per Day</b> |
|                                                            | <b>(N = 53,338)</b>   | <b>(n = 7027)</b>           | <b>(n = 20,068)</b>          | <b>(n = 11,071)</b>          | <b>(n = 15,172)</b>        |
| <b>Patients with inpatient services, n (%)</b>             | <b>11,700 (21.9)</b>  | <b>1512 (21.5)</b>          | <b>4535 (22.6)</b>           | <b>2618 (23.6)</b>           | <b>3035 (20.0)</b>         |
| Number of inpatient admissions, mean (SD)                  | 0.4 (1.1)             | 0.4 (1.0)                   | 0.4 (1.1)                    | 0.4 (1.2)                    | 0.4 (1.0)                  |
| Length of stay (in days), mean (SD)                        | 6.3 (12.2)            | 6.6 (11.6)                  | 6.2 (12.3)                   | 6.2 (12.5)                   | 6.4 (12.1)                 |
| Cost of inpatient services (2017 USD), mean (SD)           | \$8403 (\$37,258)     | \$8220 (\$40,257)           | \$8383 (\$34,093)            | \$9061 (\$39,776)            | \$8034 (\$37,914)          |
| <b>Patients with outpatient pharmacy services, n (%)</b>   | <b>53,338 (100.0)</b> | <b>7027 (100.0)</b>         | <b>20,068 (100.0)</b>        | <b>11,071 (100.0)</b>        | <b>15,172 (100.0)</b>      |
| Number of outpatient prescriptions, mean (SD)              | 26.7 (18.8)           | 28.5 (19.5)                 | 26.1 (18.0)                  | 27.7 (19.5)                  | 25.9 (18.8)                |
| Cost of outpatient prescriptions (2017 USD), mean (SD)     | \$5285 (\$9509)       | \$4782 (\$9027)             | \$5404 (\$9932)              | \$4,921 (\$8728)             | \$5627 (\$9682)            |
| <b>Patients with emergency room services, n (%)</b>        | <b>20,502 (38.4)</b>  | <b>2778 (39.5)</b>          | <b>7757 (38.7)</b>           | <b>4497 (40.6)</b>           | <b>5470 (36.1)</b>         |

|                                                                               |                      |                     |                      |                      |                      |
|-------------------------------------------------------------------------------|----------------------|---------------------|----------------------|----------------------|----------------------|
| Number of emergency room visits, mean (SD)                                    | 1.0 (2.7)            | 1.1 (2.8)           | 1.0 (2.8)            | 1.1 (2.8)            | 0.9 (2.5)            |
| Cost of emergency room visits (2017 USD), mean (SD)                           | \$894 (\$4287)       | \$1109 (\$5448)     | \$883 (\$5044)       | \$936 (\$3339)       | \$779 (\$3007)       |
| <b>Patients with physician office services, n (%)</b>                         | <b>51,813 (97.1)</b> | <b>6871 (97.8)</b>  | <b>19,574 (97.5)</b> | <b>10,736 (97.0)</b> | <b>14,632 (96.4)</b> |
| Number of physician office visits, mean (SD)                                  | 14.5 (15.3)          | 16.4 (16.2)         | 14.7 (15.3)          | 14.8 (15.4)          | 13.1 (14.4)          |
| Cost of physician office visits (2017 USD), mean (SD)                         | \$3180 (\$10,336)    | \$3048 (\$7311)     | \$3481 (\$11,702)    | \$3117 (\$9709)      | \$2888 (\$10,035)    |
| <b>Patients with other outpatient services, n (%)</b>                         | <b>46,913 (88.0)</b> | <b>6274 (89.3)</b>  | <b>17,670 (88.1)</b> | <b>9810 (88.6)</b>   | <b>13,159 (86.7)</b> |
| Number of other outpatient visits, mean (SD)                                  | 10.1 (18.0)          | 10.1 (18.1)         | 10.3 (18.2)          | 10.2 (16.8)          | 9.7 (18.3)           |
| Cost of other outpatient visits (2017 USD), mean (SD)                         | \$8253 (\$28,359)    | \$7623 (\$27,958)   | \$9039 (\$32,252)    | \$8157 (\$24,197)    | \$7575 (\$25,708)    |
| <b>Total costs (2017 USD)</b>                                                 |                      |                     |                      |                      |                      |
| Mean (SD)                                                                     | \$26,015 (\$59,880)  | \$24,781 (\$60,518) | \$27,190 (\$61,577)  | \$26,193 (\$59,059)  | \$24,903 (\$57,842)  |
| Median                                                                        | \$8720               | \$8896              | \$8919               | \$8761               | \$8349               |
| (Q1, Q3)                                                                      | (\$3415, \$22,633)   | (\$3488, \$22,598)  | (\$3662, \$22,846)   | (\$3264, \$23,549)   | (\$3112, \$21,567)   |
| <b>Epilepsy-Related<sup>a</sup> Healthcare Resource Utilization and Costs</b> |                      |                     |                      |                      |                      |
| <b>Patients with inpatient services, n (%)</b>                                | <b>5949 (11.2)</b>   | <b>636 (9.1)</b>    | <b>2480 (12.4)</b>   | <b>1217 (11.0)</b>   | <b>1616 (10.7)</b>   |

|                                                          |                       |                     |                       |                       |                       |
|----------------------------------------------------------|-----------------------|---------------------|-----------------------|-----------------------|-----------------------|
| Number of inpatient admissions, mean (SD)                | 0.1 (0.5)             | 0.1 (0.4)           | 0.2 (0.6)             | 0.1 (0.5)             | 0.1 (0.5)             |
| Length of stay (in days), mean (SD)                      | 5.8 (14.9)            | 6.0 (14.6)          | 5.8 (15.5)            | 5.7 (14.3)            | 5.8 (14.7)            |
| Cost of inpatient services (2017 USD), mean (SD)         | \$2867 (\$16,770)     | \$2141 (\$10,177)   | \$3218 (\$15,221)     | \$2656 (\$16,001)     | \$2892 (\$21,145)     |
| <b>Patients with outpatient pharmacy services, n (%)</b> | <b>53,338 (100.0)</b> | <b>7027 (100.0)</b> | <b>20,068 (100.0)</b> | <b>11,071 (100.0)</b> | <b>15,172 (100.0)</b> |
| Number of outpatient prescriptions, mean (SD)            | 6.8 (4.3)             | 6.6 (4.4)           | 6.8 (4.3)             | 6.5 (4.2)             | 7.1 (4.4)             |
| Cost of outpatient prescriptions (2017 USD), mean (SD)   | \$1075 (\$1741)       | \$691 (\$1234)      | \$1144 (\$1483)       | \$751 (\$1372)        | \$1398 (\$2327)       |
| <b>Patients with emergency room services, n (%)</b>      | <b>8500 (15.9)</b>    | <b>965 (13.7)</b>   | <b>3450 (17.2)</b>    | <b>1775 (16.0)</b>    | <b>2310 (15.2)</b>    |
| Number of emergency room visits, mean (SD)               | 0.3 (0.9)             | 0.2 (0.8)           | 0.3 (1.0)             | 0.3 (0.8)             | 0.2 (0.8)             |
| Cost of emergency room visits (2017 USD), mean (SD)      | \$239 (\$1215)        | \$235 (\$1224)      | \$261 (\$1365)        | \$235 (\$1115)        | \$215 (\$1061)        |
| <b>Patients with physician office services, n (%)</b>    | <b>35,090 (65.8)</b>  | <b>4054 (57.7)</b>  | <b>13,966 (69.6)</b>  | <b>6729 (60.8)</b>    | <b>10,341 (68.2)</b>  |

|                                                       |                      |                    |                    |                    |                    |
|-------------------------------------------------------|----------------------|--------------------|--------------------|--------------------|--------------------|
| Number of physician office visits, mean (SD)          | 2.0 (2.6)            | 1.8 (2.6)          | 2.2 (2.6)          | 1.8 (2.6)          | 2.0 (2.5)          |
| Cost of physician office visits (2017 USD), mean (SD) | \$334 (\$849)        | \$323 (\$785)      | \$380 (\$974)      | \$284 (\$725)      | \$316 (\$779)      |
| <b>Patients with other outpatient services, n (%)</b> | <b>25,006 (46.9)</b> | <b>2838 (40.4)</b> | <b>9725 (48.5)</b> | <b>4941 (44.6)</b> | <b>7502 (49.4)</b> |
| Number of other outpatient visits, mean (SD)          | 1.4 (4.5)            | 1.1 (3.4)          | 1.4 (4.1)          | 1.2 (2.9)          | 1.6 (6.2)          |
| Cost of other outpatient visits (2017 USD), mean (SD) | \$1042 (\$5995)      | \$772 (\$3492)     | \$1131 (\$6464)    | \$976 (\$6196)     | \$1095 (\$6115)    |
| <b>Total costs: (2017 USD)</b>                        |                      |                    |                    |                    |                    |
| Mean (SD)                                             | \$5557 (\$19,190)    | \$4161 (\$12,011)  | \$6134 (\$18,149)  | \$4903 (\$18,370)  | \$5917 (\$23,327)  |
| Median                                                | \$1219               | \$773              | \$1599             | \$812              | \$1320             |
| (Q1, Q3)                                              | (\$362, \$3917)      | (\$201, \$2685)    | (\$507, \$304)     | (\$234, \$3289)    | (\$428, \$4430)    |

<sup>a</sup>Services are considered epilepsy-related if claims contain either an epilepsy diagnosis, nonfebrile convulsions diagnosis, or an AED prescription.

AED = anti-epileptic drug; Q = quartile; SD = standard deviation; USD = US dollars.

**Table S2. Poisson Regression Models Evaluating Significant Effects on Healthcare Resource Utilization per Patient During the 12-Month Follow-up Period, by Index AED Pill Burden**

|                                                         | <b>All Patients (N= 53, 338)</b> |                                |                |
|---------------------------------------------------------|----------------------------------|--------------------------------|----------------|
|                                                         | <b>Incidence Rate Ratio</b>      | <b>95% Confidence Interval</b> | <b>P Value</b> |
| <b>All-Cause Healthcare Resource Utilization</b>        |                                  |                                |                |
| <b>Inpatient</b>                                        |                                  |                                |                |
| Index AED pill burden<br>(ref = >0-1 pill/day)          |                                  |                                |                |
| >1-2 pills/day                                          | 1.026                            | (0.980-1.075)                  | 0.2644         |
| >2-3 pills/day                                          | 1.046                            | (0.997-1.097)                  | 0.0681         |
| >3 pills/day                                            | 0.990                            | (0.944-1.037)                  | 0.6665         |
| <b>Outpatient pharmacy</b>                              |                                  |                                |                |
| Index AED pill burden<br>(ref = >0-1 pill/day)          |                                  |                                |                |
| >1-2 pills/day                                          | 0.963                            | (0.958-0.969)                  | <0.0001        |
| >2-3 pills/day                                          | 0.960                            | (0.955-0.966)                  | <0.0001        |
| >3 pills/day                                            | 0.982                            | (0.977-0.988)                  | <0.0001        |
| <b>Emergency room</b>                                   |                                  |                                |                |
| Index AED pill burden<br>(ref = >0-1 pill/day)          |                                  |                                |                |
| >1-2 pills/day                                          | 1.019                            | (0.991-1.048)                  | 0.1800         |
| >2-3 pills/day                                          | 1.033                            | (1.003-1.064)                  | 0.0318         |
| >3 pills/day                                            | 0.971                            | (0.944-1.000)                  | 0.0500         |
| <b>Physician office</b>                                 |                                  |                                |                |
| Index AED pill burden<br>(ref = >0-1 pill/day)          |                                  |                                |                |
| >1-2 pills/day                                          | 0.949                            | (0.942-0.955)                  | <0.0001        |
| >2-3 pills/day                                          | 0.906                            | (0.899-0.913)                  | <0.0001        |
| >3 pills/day                                            | 0.880                            | (0.874-0.887)                  | <0.0001        |
| <b>Other outpatient</b>                                 |                                  |                                |                |
| Index AED pill burden<br>(ref = >0-1 pill/day)          |                                  |                                |                |
| >1-2 pills/day                                          | 0.968                            | (0.959-0.977)                  | <0.0001        |
| >2-3 pills/day                                          | 0.973                            | (0.963-0.982)                  | <0.0001        |
| >3 pills/day                                            | 1.010                            | (1.001-1.020)                  | 0.0273         |
| <b>Epilepsy-Related Healthcare Resource Utilization</b> |                                  |                                |                |
| <b>Inpatient</b>                                        |                                  |                                |                |
| Index AED pill burden<br>(ref = >0-1 pill/day)          |                                  |                                |                |
| >1-2 pills/day                                          | 1.125                            | (1.039-1.218)                  | 0.0036         |
| >2-3 pills/day                                          | 1.231                            | (1.129-1.342)                  | <0.0001        |
| >3 pills/day                                            | 1.194                            | (1.101-1.296)                  | <0.0001        |
| <b>Outpatient pharmacy</b>                              |                                  |                                |                |
| Index AED pill burden<br>(ref = >0-1 pill/day)          |                                  |                                |                |
| >1-2 pills/day                                          | 1.010                            | (0.999-1.021)                  | 0.0814         |

|                                                |       |               |         |
|------------------------------------------------|-------|---------------|---------|
| >2-3 pills/day                                 | 1.010 | (0.998-1.022) | 0.1102  |
| >3 pills/day                                   | 1.071 | (1.059-1.083) | <0.0001 |
| <b>Emergency room</b>                          |       |               |         |
| Index AED pill burden<br>(ref = >0-1 pill/day) |       |               |         |
| >1-2 pills/day                                 | 1.155 | (1.089-1.224) | <0.0001 |
| >2-3 pills/day                                 | 1.252 | (1.174-1.334) | <0.0001 |
| >3 pills/day                                   | 1.151 | (1.083-1.222) | <0.0001 |
| <b>Physician office</b>                        |       |               |         |
| Index AED pill burden<br>(ref = >0-1 pill/day) |       |               |         |
| >1-2 pills/day                                 | 1.084 | (1.062-1.107) | <0.0001 |
| >2-3 pills/day                                 | 1.147 | (1.121-1.174) | <0.0001 |
| >3 pills/day                                   | 1.125 | (1.101-1.149) | <0.0001 |
| <b>Other outpatient</b>                        |       |               |         |
| Index AED pill burden<br>(ref = >0-1 pill/day) |       |               |         |
| >1-2 pills/day                                 | 1.056 | (1.029-1.083) | <0.0001 |
| >2-3 pills/day                                 | 1.162 | (1.130-1.196) | <0.0001 |
| >3 pills/day                                   | 1.316 | (1.283-1.351) | <0.0001 |

Note: Each setting represents model results from separate Poisson regressions. The following candidate covariates were removed due to collinearity or insufficient sample sizes: index AED type and diagnoses observed during data period. AED = anti-epileptic drug.

**Table S3. All-Cause and Epilepsy-Related<sup>a</sup> Healthcare Resource Utilization and Costs per Patient During the 12-Month Follow-up Period, by Index AED Dosing Frequency**

| <b>All-Cause Healthcare Resource Utilization and Costs</b> |                       |                     |                       |                       |                         |
|------------------------------------------------------------|-----------------------|---------------------|-----------------------|-----------------------|-------------------------|
|                                                            | <b>All Patients</b>   | <b>Once Daily</b>   | <b>Twice Daily</b>    | <b>Thrice Daily</b>   | <b>Four Times Daily</b> |
|                                                            | <b>(N = 53,338)</b>   | <b>(n = 5974)</b>   | <b>(n = 31,218)</b>   | <b>(n = 16,102)</b>   | <b>(n = 44)</b>         |
| <b>Patients with inpatient services, n (%)</b>             | <b>11,700 (21.9)</b>  | <b>1025 (17.2)</b>  | <b>6512 (20.9)</b>    | <b>4155 (25.8)</b>    | <b>8 (18.2)</b>         |
| Number of inpatient admissions, mean (SD)                  | 0.4 (1.1)             | 0.3 (0.9)           | 0.4 (1.0)             | 0.5 (1.3)             | 0.4 (1.2)               |
| Length of stay (in days), mean (SD)                        | 6.3 (12.2)            | 7.2 (16.9)          | 6.2 (12.4)            | 6.3 (10.3)            | 10.4 (8.1)              |
| Cost of inpatient services (2017 USD), mean (SD)           | \$8403 (\$37,258)     | \$5841 (\$27,100)   | \$7559 (\$35,055)     | \$10,988 (\$43,945)   | \$8954 (\$26,528)       |
| <b>Patients with outpatient pharmacy services, n (%)</b>   | <b>53,338 (100.0)</b> | <b>5974 (100.0)</b> | <b>31,218 (100.0)</b> | <b>16,102 (100.0)</b> | <b>44 (100.0)</b>       |
| Number of outpatient prescriptions, mean (SD)              | 26.7 (18.8)           | 25.0 (17.9)         | 25.6 (17.6)           | 29.4 (20.8)           | 34.2 (28.2)             |
| Cost of outpatient prescriptions (2017 USD), mean (SD)     | \$5285 (\$9509)       | \$4091 (\$6687)     | \$5779 (\$10,074)     | \$4772 (\$9211)       | \$5142 (\$5921)         |
| <b>Patients with emergency room services, n (%)</b>        | <b>20,502 (38.4)</b>  | <b>2067 (34.6)</b>  | <b>11,670 (37.4)</b>  | <b>6749 (41.9)</b>    | <b>16 (36.4)</b>        |
| Number of emergency room visits, mean (SD)                 | 1.0 (2.7)             | 0.9 (2.4)           | 0.9 (2.6)             | 1.2 (3.1)             | 1.0 (2.5)               |
| Cost of emergency room visits (2017 USD), mean (SD)        | \$894 (\$4287)        | \$695 (\$2514)      | \$839 (\$4437)        | \$1075 (\$4506)       | \$580 (\$1474)          |
| <b>Patients with physician office services, n (%)</b>      | <b>51,813 (97.1)</b>  | <b>5787 (96.9)</b>  | <b>30,433 (97.5)</b>  | <b>15,553 (96.6)</b>  | <b>40 (90.9)</b>        |
| Number of physician office visits, mean (SD)               | 14.5 (15.3)           | 12.7 (14.0)         | 14.2 (14.9)           | 15.7 (16.3)           | 11.2 (12.1)             |
| Cost of physician office visits (2017 USD), mean (SD)      | \$3180 (\$10,336)     | \$2177 (\$5585)     | \$3171 (\$10,527)     | \$3573 (\$11,267)     | \$1644 (\$2197)         |



|                                                                               |                        |                        |                        |                        |                        |
|-------------------------------------------------------------------------------|------------------------|------------------------|------------------------|------------------------|------------------------|
| <b>Patients with other outpatient services, n (%)</b>                         | <b>46,913 (88.0)</b>   | <b>5135 (86.0)</b>     | <b>27,393 (87.7)</b>   | <b>14,343 (89.1)</b>   | <b>42 (95.5)</b>       |
| Number of other outpatient visits, mean (SD)                                  | 10.1 (18.0)            | 8.0 (14.8)             | 9.6 (17.6)             | 11.7 (19.5)            | 23.9 (28.3)            |
| Cost of other outpatient visits (2017 USD), mean (SD)                         | \$8253<br>(\$28,359)   | \$5245<br>(\$21,063)   | \$8107<br>(\$29,203)   | \$9617<br>(\$28,878)   | \$21,010<br>(\$49,124) |
| <b>Total costs (2017 USD)</b>                                                 |                        |                        |                        |                        |                        |
| Mean (SD)                                                                     | \$26,015<br>(\$59,880) | \$18,049<br>(\$42,440) | \$25,455<br>(\$58,894) | \$30,026<br>(\$66,565) | \$37,331<br>(\$71,184) |
| Median                                                                        | \$8720                 | \$6461                 | \$8973                 | \$9207                 | \$14,766               |
| (Q1, Q3)                                                                      | (\$3415,<br>\$22,633)  | (\$2461,<br>\$15,921)  | (\$3888,<br>\$21,781)  | (\$2839,<br>\$27,853)  | (\$3687,<br>\$35,973)  |
| <b>Epilepsy-Related<sup>a</sup> Healthcare Resource Utilization and Costs</b> |                        |                        |                        |                        |                        |
| <b>Patients with inpatient services, n (%)</b>                                | <b>5949 (11.2)</b>     | <b>537 (9.0)</b>       | <b>3743 (12.0)</b>     | <b>1666 (10.3)</b>     | <b>3 (6.8)</b>         |
| Number of inpatient admissions, mean (SD)                                     | 0.1 (0.5)              | 0.1 (0.5)              | 0.2 (0.6)              | 0.1 (0.5)              | 0.2 (0.8)              |
| Length of stay (in days), mean (SD)                                           | 5.8 (14.9)             | 6.8 (20.5)             | 5.8 (14.0)             | 5.6 (14.9)             | 7.9 (7.8)              |
| Cost of inpatient services (2017 USD), mean (SD)                              | \$2867<br>(\$16,770)   | \$2213<br>(\$13,968)   | \$3172<br>(\$17,714)   | \$2516<br>(\$15,799)   | \$3447<br>(\$17,581)   |
| <b>Patients with outpatient pharmacy services, n (%)</b>                      | <b>53,338 (100.0)</b>  | <b>5974 (100.0)</b>    | <b>31,218 (100.0)</b>  | <b>16,102 (100.0)</b>  | <b>44 (100.0)</b>      |
| Number of outpatient prescriptions, mean (SD)                                 | 6.8 (4.3)              | 6.9 (4.5)              | 7.0 (4.4)              | 6.4 (4.2)              | 8.5 (5.4)              |
| Cost of outpatient prescriptions (2017 USD), mean (SD)                        | \$1075 (\$1741)        | \$757 (\$1133)         | \$1526 (\$2055)        | \$320 (\$608)          | \$638 (\$733)          |
| <b>Patients with emergency room services, n (%)</b>                           | <b>8500 (15.9)</b>     | <b>866 (14.5)</b>      | <b>5319 (17.0)</b>     | <b>2311 (14.4)</b>     | <b>4 (9.1)</b>         |
| Number of emergency room visits, mean (SD)                                    | 0.3 (0.9)              | 0.2 (0.8)              | 0.3 (0.9)              | 0.2 (0.8)              | 0.1 (0.4)              |
| Cost of emergency room visits (2017 USD), mean (SD)                           | \$239 (\$1215)         | \$201 (\$999)          | \$257 (\$1306)         | \$220 (\$1100)         | \$88 (\$461)           |

|                                                       |                      |                    |                      |                    |                   |
|-------------------------------------------------------|----------------------|--------------------|----------------------|--------------------|-------------------|
| <b>Patients with physician office services, n (%)</b> | <b>35,090 (65.8)</b> | <b>4004 (67.0)</b> | <b>22,420 (71.8)</b> | <b>8639 (53.7)</b> | <b>27 (61.4)</b>  |
| Number of physician office visits, mean (SD)          | 2.0 (2.6)            | 1.9 (2.5)          | 2.3 (2.7)            | 1.5 (2.4)          | 1.8 (1.9)         |
| Cost of physician office visits (2017 USD), mean (SD) | \$334 (\$849)        | \$298 (\$721)      | \$395 (\$953)        | \$230 (\$644)      | \$220 (\$313)     |
| <b>Patients with other outpatient services, n (%)</b> | <b>25,006 (46.9)</b> | <b>2880 (48.2)</b> | <b>15,431 (49.4)</b> | <b>6666 (41.4)</b> | <b>29 (65.9)</b>  |
| Number of other outpatient visits, mean (SD)          | 1.4 (4.5)            | 1.3 (3.8)          | 1.5 (4.7)            | 1.2 (4.4)          | 3.5 (7.2)         |
| Cost of other outpatient visits (2017 USD), mean (SD) | \$1042 (\$5995)      | \$860 (\$5227)     | \$1168 (\$6374)      | \$862 (\$5481)     | \$1510 (\$3273)   |
| <b>Total costs (2017 USD)</b>                         |                      |                    |                      |                    |                   |
| Mean (SD)                                             | \$5557 (\$19,190)    | \$4330 (\$16,223)  | \$6517 (\$20,412)    | \$4149 (\$17,581)  | \$5903 (\$19,565) |
| Median                                                | \$1219               | \$970              | \$1954               | \$467              | \$1175            |
| (Q1, Q3)                                              | (\$362, \$3917)      | (\$408, \$2509)    | (\$653, \$5069)      | (\$168, \$1764)    | (\$496, \$2578)   |

<sup>a</sup>Services are considered disease related if claims contain either an epilepsy diagnosis, nonfebrile convulsions diagnosis, or an AED prescription.

AED = anti-epileptic drug; Q = quartile; SD = standard deviation; USD = US dollars.

**Table S4. Poisson Regression Models Evaluating Significant Effects on Healthcare Resource Utilization per Patient During the 12-Month Follow-up Period, by Index AED Dosing Frequency**

|                                                         | All Patients (N = 53, 338) |                         |         |
|---------------------------------------------------------|----------------------------|-------------------------|---------|
|                                                         | Incidence Rate Ratio       | 95% Confidence Interval | P Value |
| <b>All-Cause Healthcare Resource Utilization</b>        |                            |                         |         |
| <b>Inpatient</b>                                        |                            |                         |         |
| Index AED dosing frequency (ref = once daily)           |                            |                         |         |
| Twice daily                                             | 1.000                      | (0.951-1.052)           | 0.9986  |
| Thrice daily                                            | 1.362                      | (1.294-1.434)           | <0.0001 |
| Four times daily                                        | 0.939                      | (0.597-1.476)           | 0.7851  |
| <b>Outpatient pharmacy</b>                              |                            |                         |         |
| Index AED dosing frequency (ref = once daily)           |                            |                         |         |
| Twice daily                                             | 0.965                      | (0.959-0.970)           | <0.0001 |
| Thrice daily                                            | 1.064                      | (1.058-1.070)           | <0.0001 |
| Four times daily                                        | 1.219                      | (1.159-1.283)           | <0.0001 |
| <b>Emergency room</b>                                   |                            |                         |         |
| Index AED dosing frequency (ref = once daily)           |                            |                         |         |
| Twice daily                                             | 0.987                      | (0.957-1.017)           | 0.3868  |
| Thrice daily                                            | 1.403                      | (1.360-1.448)           | <0.0001 |
| Four times daily                                        | 0.779                      | (0.575-1.056)           | 0.1075  |
| <b>Physician office</b>                                 |                            |                         |         |
| Index AED dosing frequency (ref = once daily)           |                            |                         |         |
| Twice daily                                             | 1.028                      | (1.020-1.037)           | <0.0001 |
| Thrice daily                                            | 1.112                      | (1.103-1.122)           | <0.0001 |
| Four times daily                                        | 0.741                      | (0.678, 0.809)          | <0.0001 |
| <b>Other outpatient</b>                                 |                            |                         |         |
| Index AED dosing frequency (ref = once daily)           |                            |                         |         |
| Twice daily                                             | 0.973                      | (0.964-0.983)           | <0.0001 |
| Thrice daily                                            | 1.183                      | (1.171-1.195)           | <0.0001 |
| Four times daily                                        | 2.024                      | (1.904-2.151)           | <0.0001 |
| <b>Epilepsy-Related Healthcare Resource Utilization</b> |                            |                         |         |
| <b>Inpatient</b>                                        |                            |                         |         |
| Index AED dosing frequency (ref = once daily)           |                            |                         |         |
| Twice daily                                             | 1.068                      | (0.987-1.156)           | 0.1026  |
| Thrice daily                                            | 1.005                      | (0.924-1.093)           | 0.9007  |
| Four times daily                                        | 1.200                      | (0.598-2.410)           | 0.6075  |
| <b>Outpatient pharmacy</b>                              |                            |                         |         |
| Index AED dosing frequency (ref = once daily)           |                            |                         |         |
| Twice daily                                             | 1.002                      | (0.991-1.012)           | 0.7781  |
| Thrice daily                                            | 0.929                      | (0.918-0.940)           | <0.0001 |
| Four times daily                                        | 1.251                      | (1.130-1.386)           | <0.0001 |
| <b>Emergency room</b>                                   |                            |                         |         |
| Index AED dosing frequency (ref = once daily)           |                            |                         |         |
| Twice daily                                             | 1.092                      | (1.031-1.157)           | 0.0029  |
| Thrice daily                                            | 1.151                      | (1.082-1.225)           | <0.0001 |

|                                               |       |               |         |
|-----------------------------------------------|-------|---------------|---------|
| Four times daily                              | 0.401 | (0.167-0.966) | 0.0416  |
| <b>Physician office</b>                       |       |               |         |
| Index AED dosing frequency (ref = once daily) |       |               |         |
| Twice daily                                   | 1.059 | (1.037-1.080) | <0.0001 |
| Thrice daily                                  | 0.834 | (0.816-0.853) | <0.0001 |
| Four times daily                              | 0.941 | (0.752-1.177) | 0.5949  |
| <b>Other outpatient</b>                       |       |               |         |
| Index AED dosing frequency (ref = once daily) |       |               |         |
| Twice daily                                   | 0.960 | (0.937-0.984) | 0.0011  |
| Thrice daily                                  | 0.950 | (0.925-0.975) | 0.0001  |
| Four times daily                              | 2.298 | (1.957-2.698) | <0.0001 |

Note: Each setting represents model results from separate Poisson regressions. The following candidate covariates were removed due to collinearity or insufficient sample sizes: index AED type, index AED mechanism class, and diagnoses observed during data period. AED = anti-epileptic drug.
